# Supplementary material for: Metal–organic gels as functionalisable supports for catalysis
Source: Royal Society of Chemistry journal article supplement (doi:10.1039/b822104a), 2009-01-01
Supplement: b822104a.pdf [file b822104a.pdf]

**Supplementary Information:**

**Metal-organic gels as functionalisable supports for catalysis**

Jianyong Zhang,\* Xiaobing Wang, Lisi He, Liuping Chen, Cheng-Yong Su and Stuart L. James

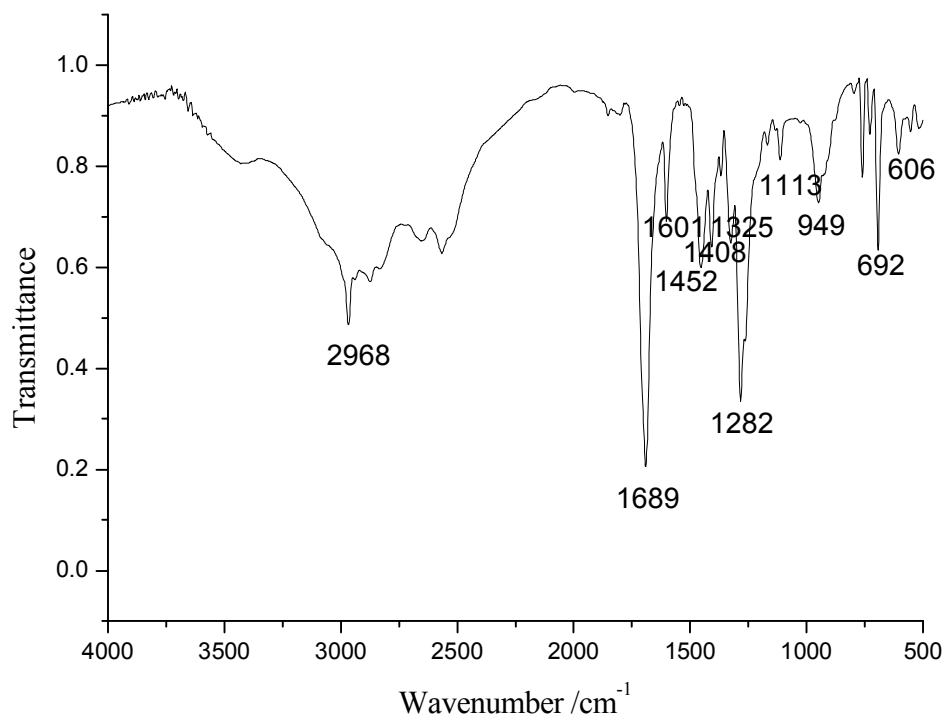

Figure S1 Infrared spectrum of 5-*tert*-butylisophthalic acid (H<sub>2</sub>BuBDC) (KBr pellet)

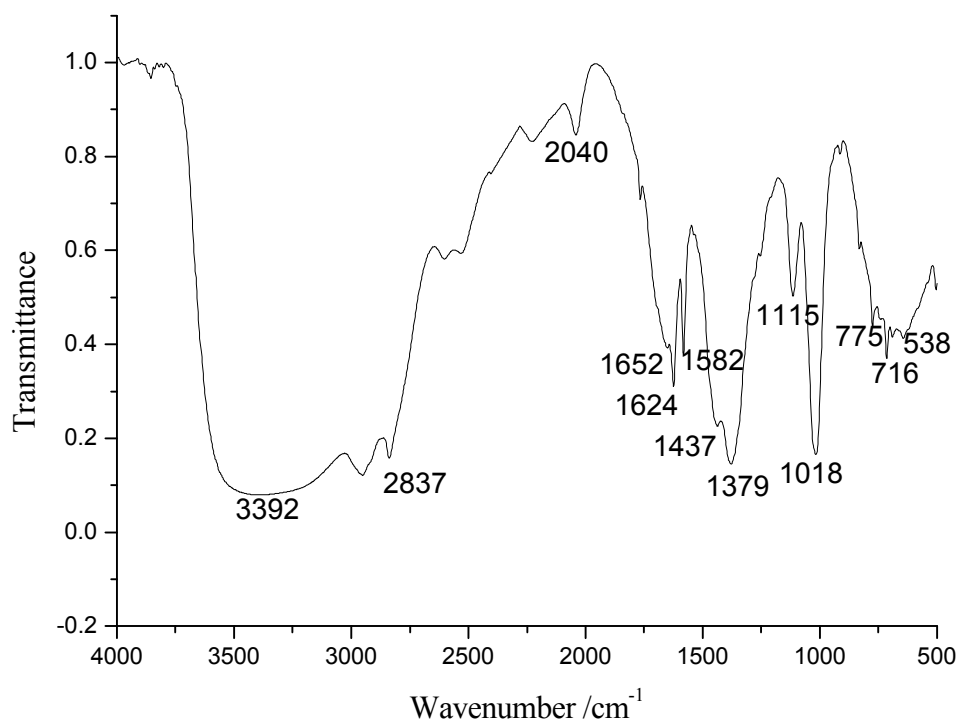

Figure S2 Infrared spectrum of H<sub>2</sub>BuBDC-Fe gel formed in MeOH (GBu1) (neat gel, KBr plates)

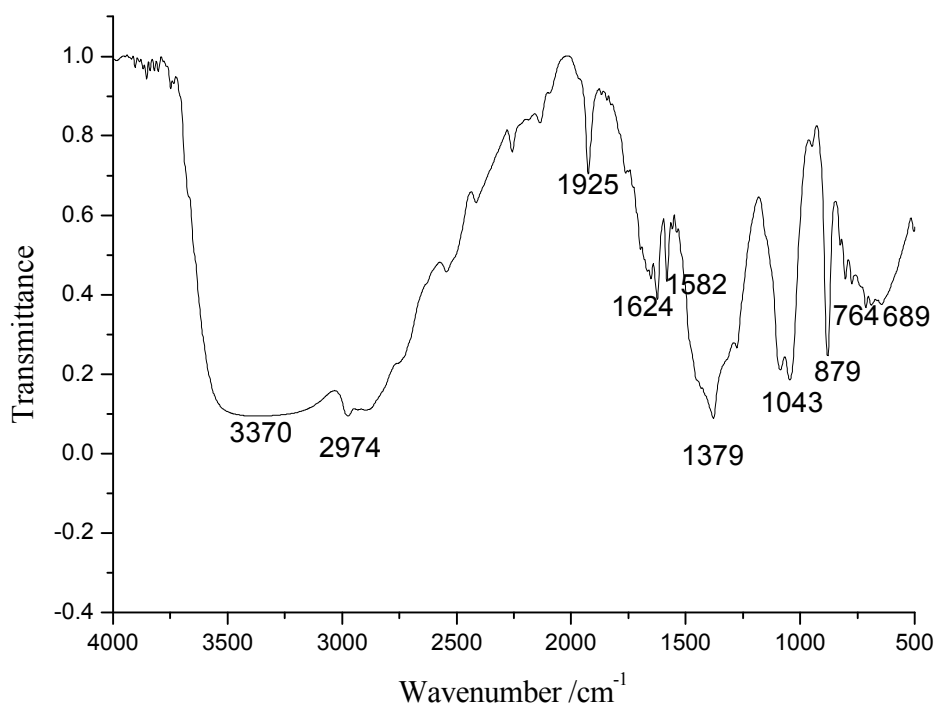

Figure S3 Infrared spectrum of H<sub>2</sub>BuBDC-Fe gel formed in EtOH (GBu2) (neat gel, KBr plates)

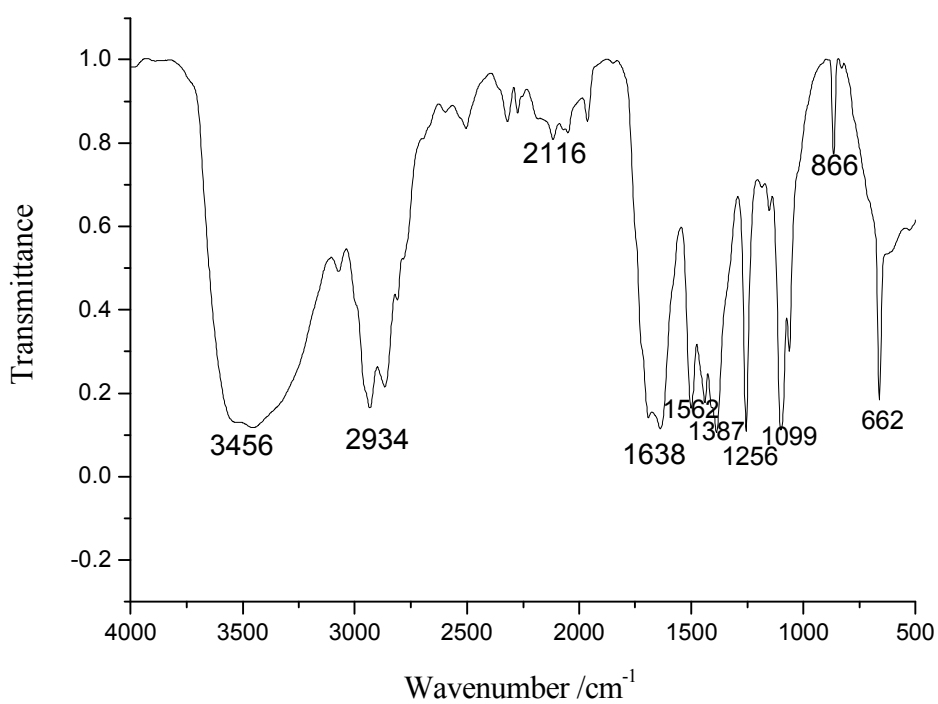

Figure S4 Infrared spectrum of H<sub>2</sub>BuBDC-Fe gel formed in DMF (GBu3) (neat gel, KBr plates)

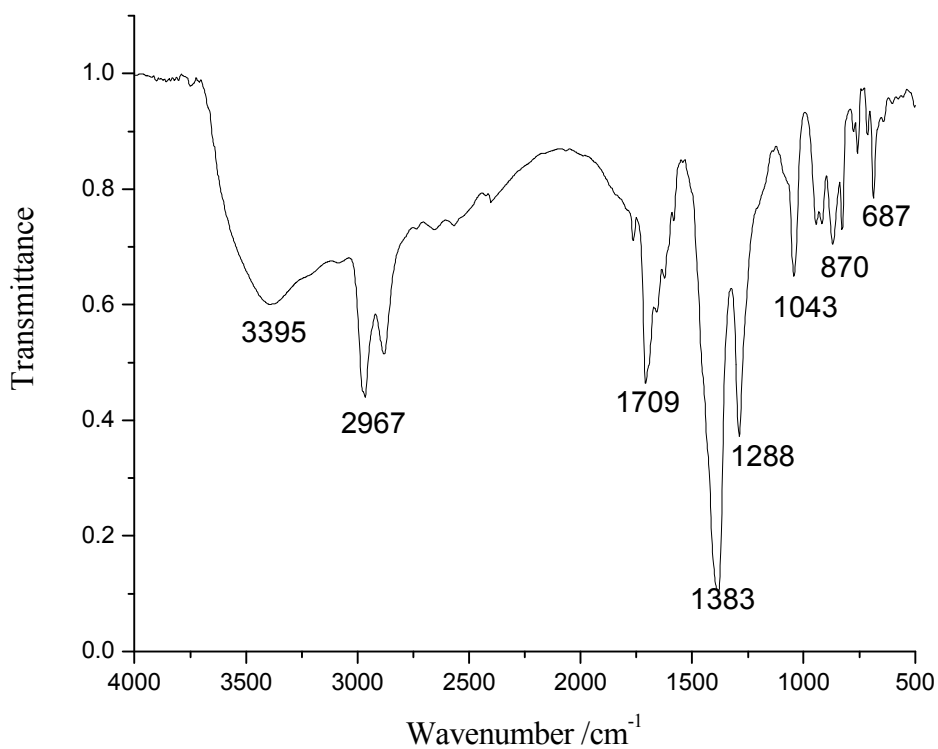

Figure S5 Infrared spectrum of H<sub>2</sub>BuBDC-Fe gel formed in THF (GBu4) (neat gel, KBr plates)

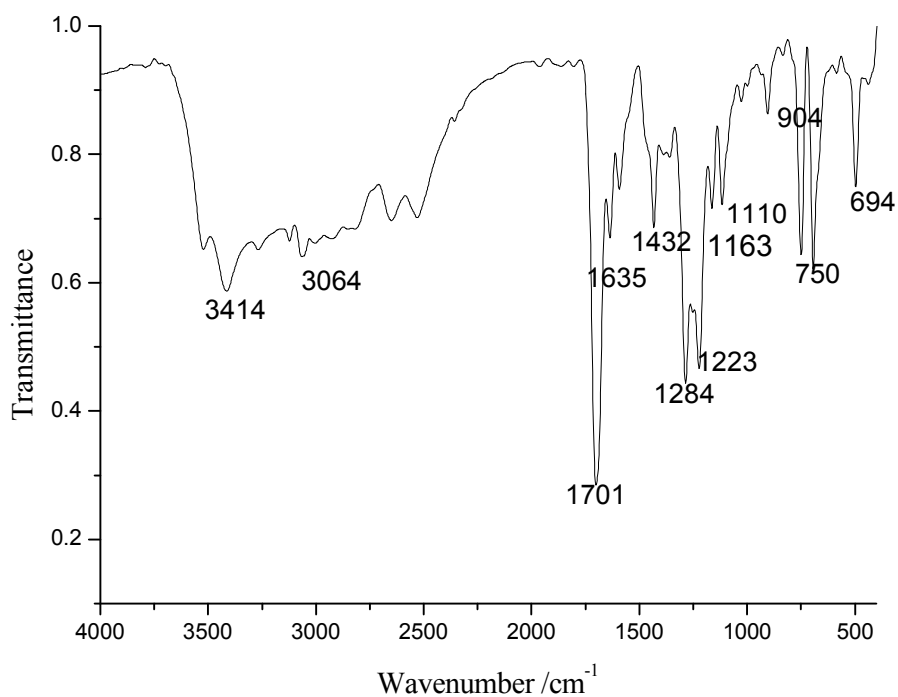

Figure S6 Infrared spectrum of 5-diphenylphosphanylisophthalic acid (H<sub>2</sub>PBDC) (KBr pellet)

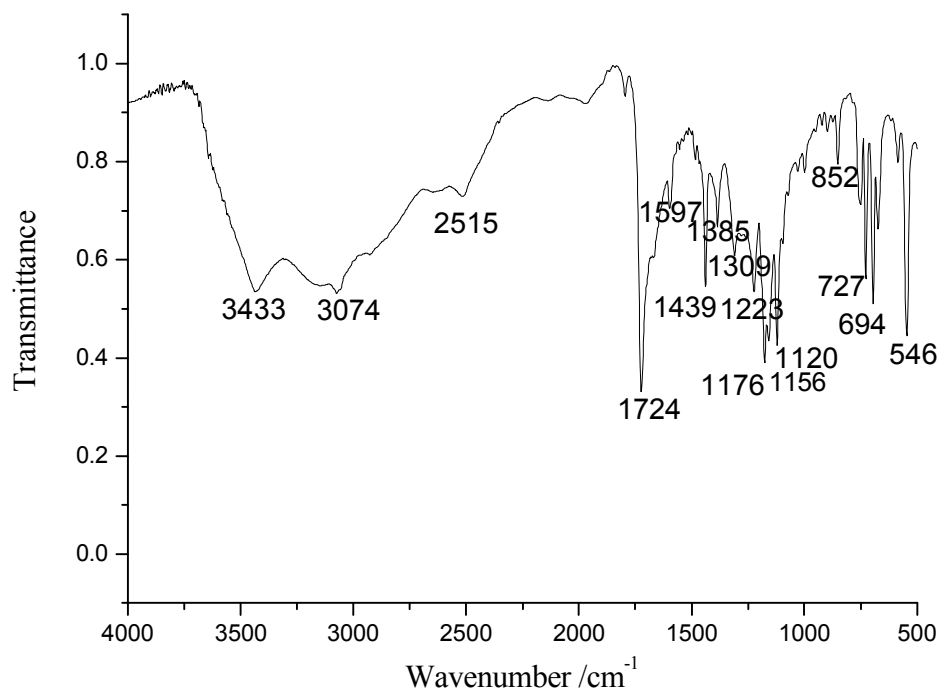

Figure S7 Infrared spectrum of 5-diphenylphosphanylisophthalic acid oxidized by H<sub>2</sub>O<sub>2</sub> (KBr pellet)

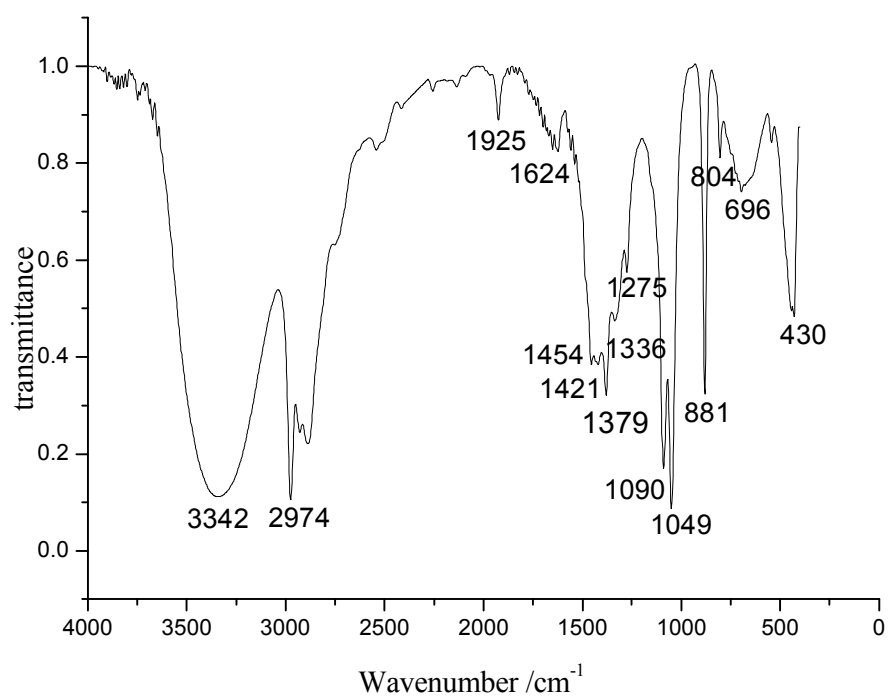

Figure S8 Infrared spectrum of H<sub>2</sub>PBDC-Fe gel formed in EtOH (GP1) (neat gel, KBr plates)

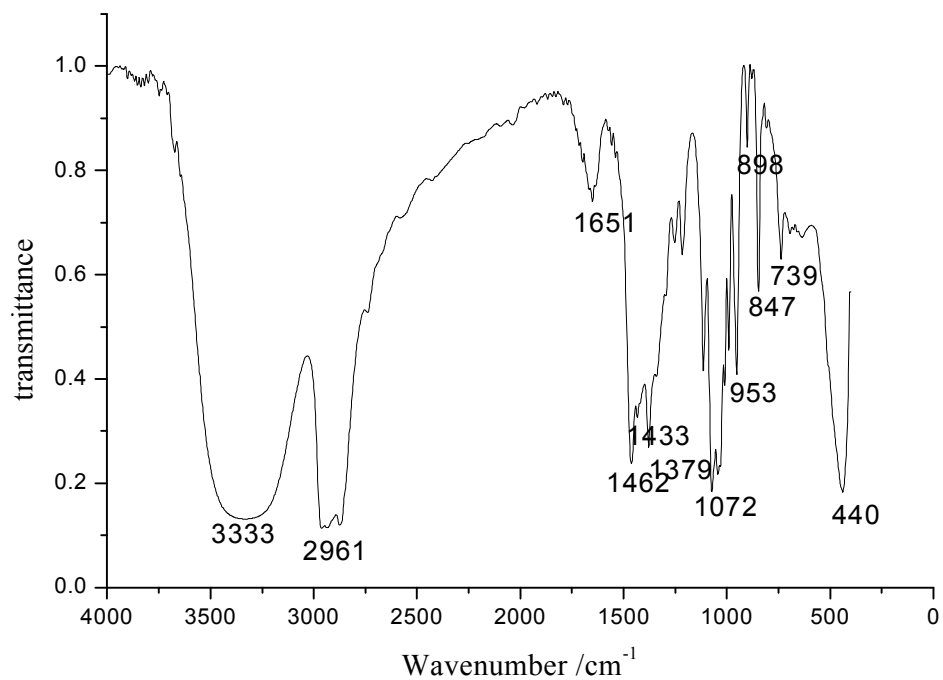

Figure S9 Infrared spectrum of H<sub>2</sub>PBDC-Fe gel formed in *n*-BuOH (GP2) (neat gel, KBr plates)

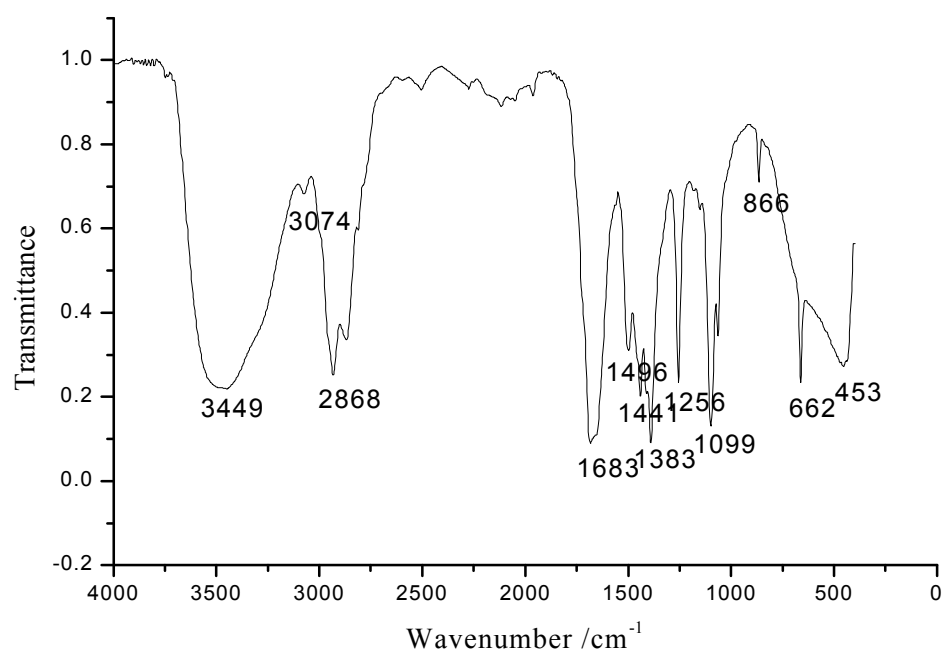

Figure S10 Infrared spectrum of H<sub>2</sub>PBDC-Fe gel formed in DMF (GP3) (neat gel, KBr plates)

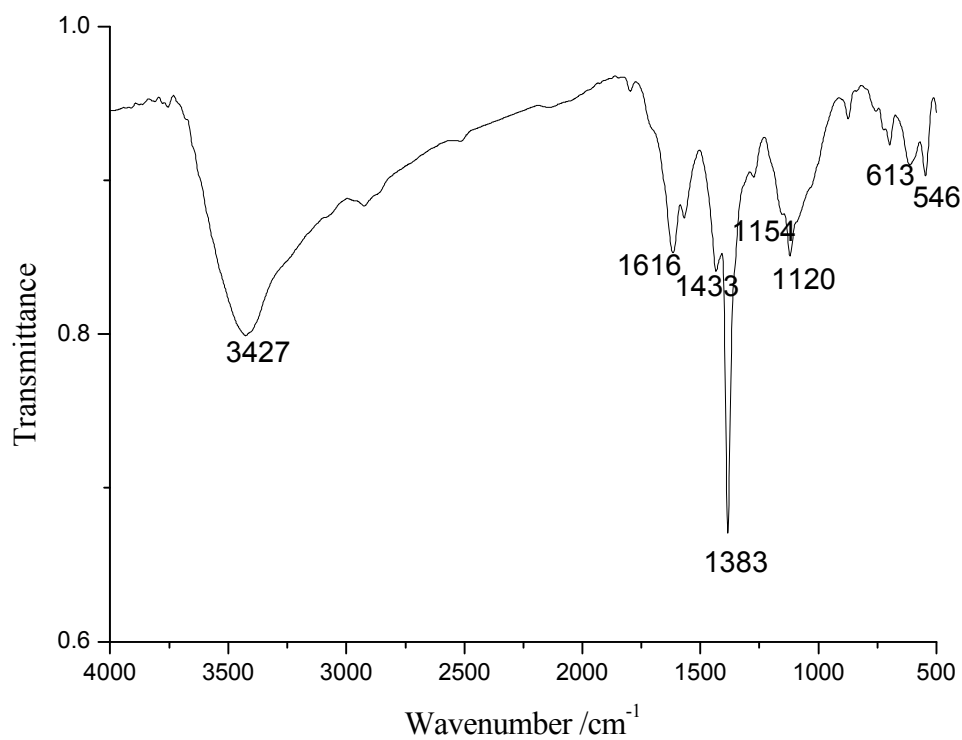

Figure S11 Infrared spectrum of xerogel gP1 (KBr pellet)

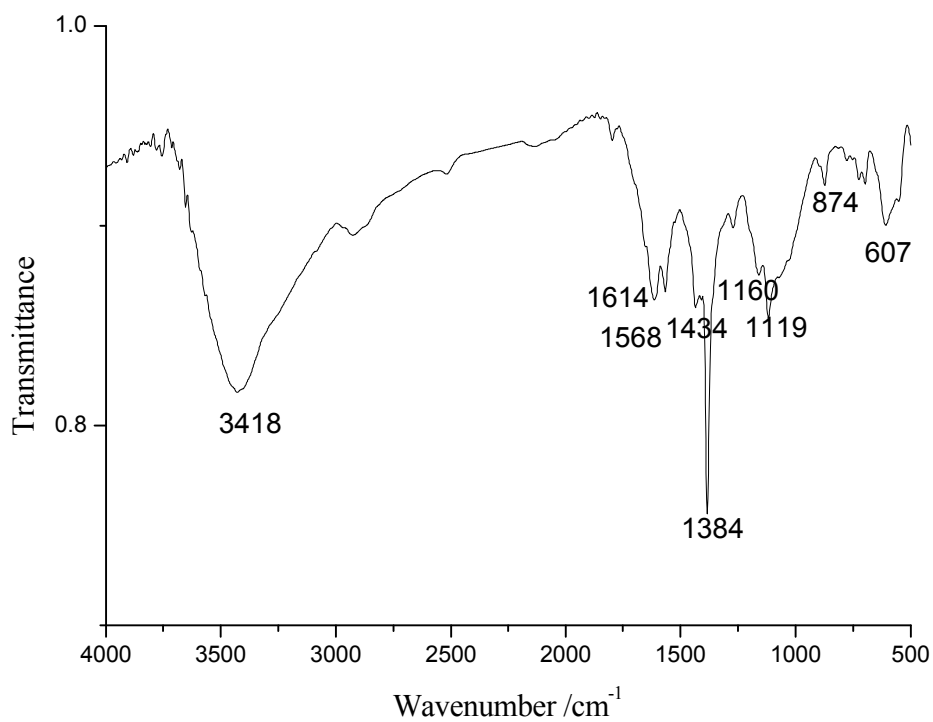

Figure S12 Infrared spectrum of xerogel gP2 (KBr pellet)

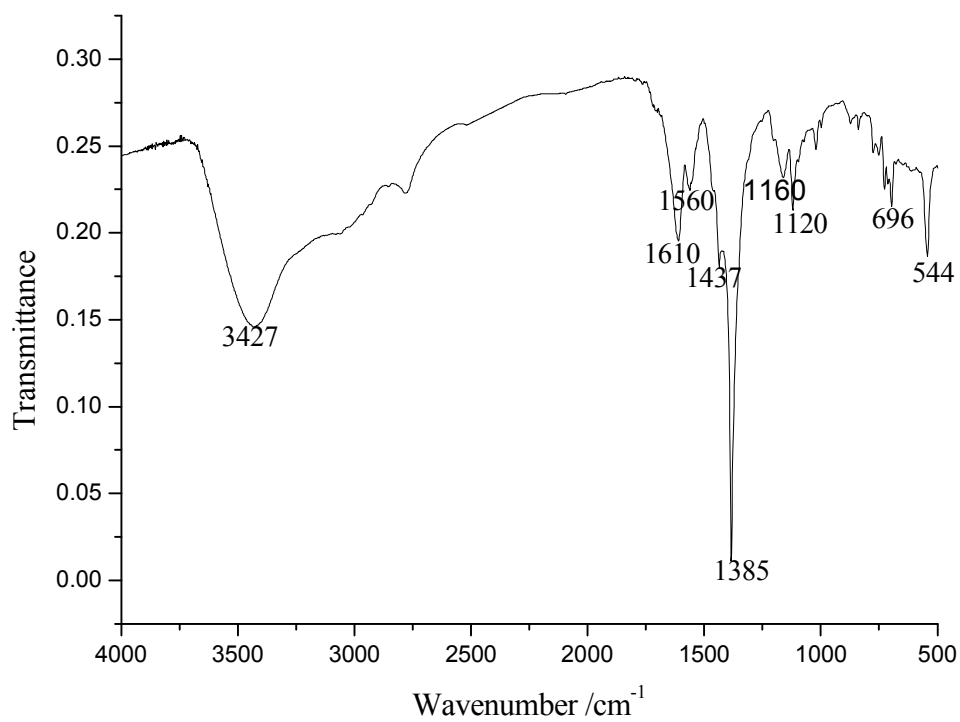

Figure S13 Infrared spectrum of xerogel gP3 (KBr pellet)

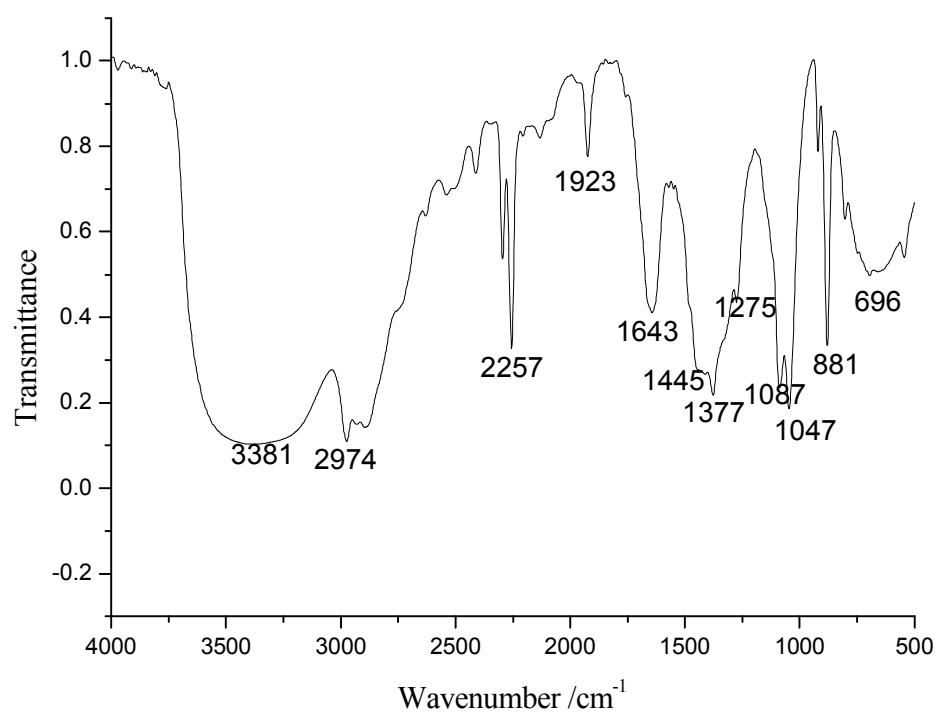

Figure S14 Infrared spectrum of GP1-Pd (neat gel, KBr plates)

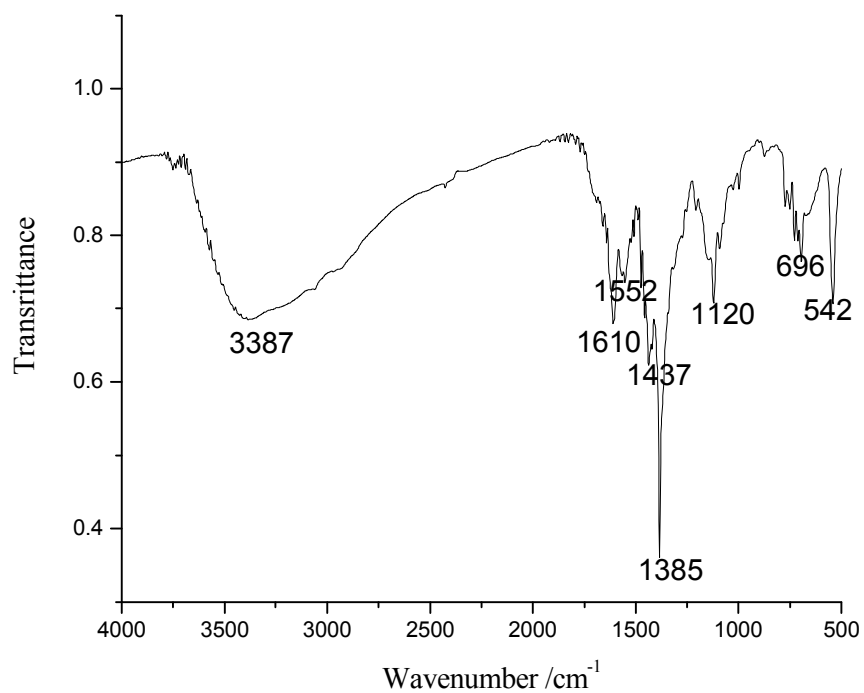

Figure S15 Infrared spectrum of xerogel gP1-Pd (KBr pellet)



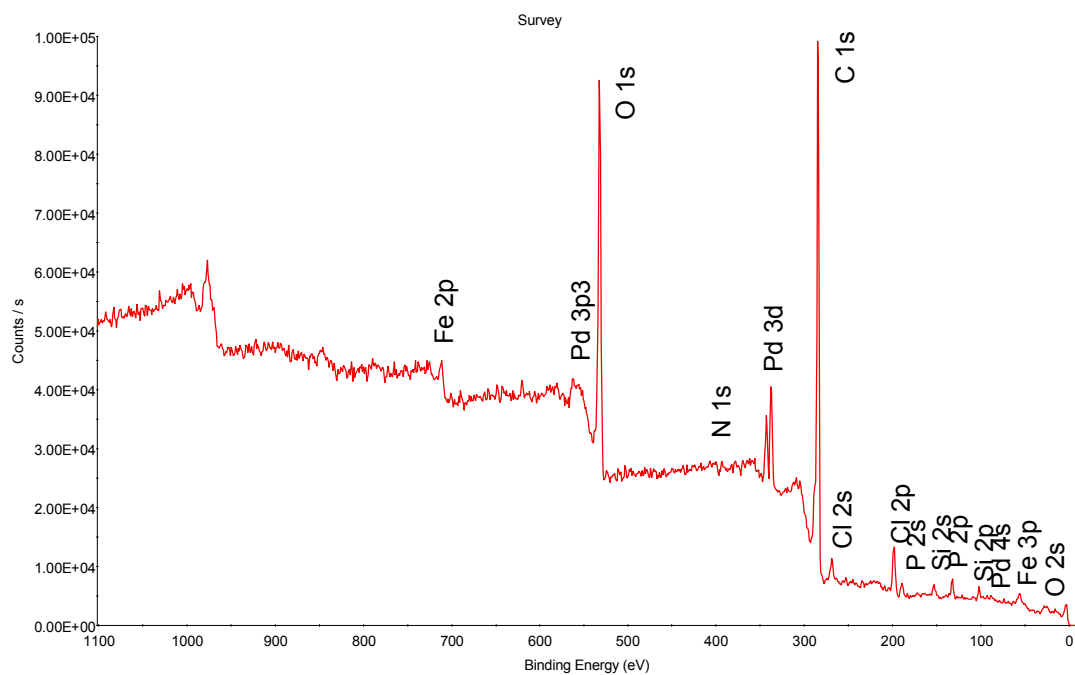

Figure S16 XPS spectrum of GP1-Pd
